# Supplementary material
Source: PubMed Central journal article supplement (PMC3815676)
Supplement: NIHMS516808-supplement-1.pdf [file NIHMS516808-supplement-1.pdf]

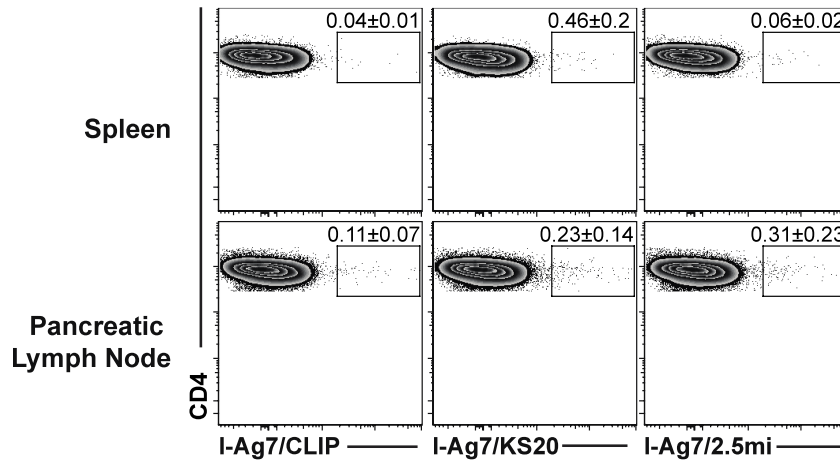

**Supplemental Figure 1. Tetramer staining in the spleen and pancreatic lymph nodes.** Single cell suspensions were prepared from spleen (n = 13) and pancreatic lymph nodes (n = 3) of non-diabetic NOD mice (10 – 28 weeks old). Cells were then stained with I-Ag7/CLIP, I-Ag7/KS20 or I-Ag7/2.5mi tetramers. After 2.5 h, cells were stained with a master mix of antibodies and gates were set on live / singlets / CD4+ CD45+ TCRβ+ / CD8- CD11b- CD11c- F4/80- CD19- 7AAD- cells; zebra plots show the average percentage of tetramer-positive cells in each organ ± standard deviation. Data summarize 3 independent experiments.

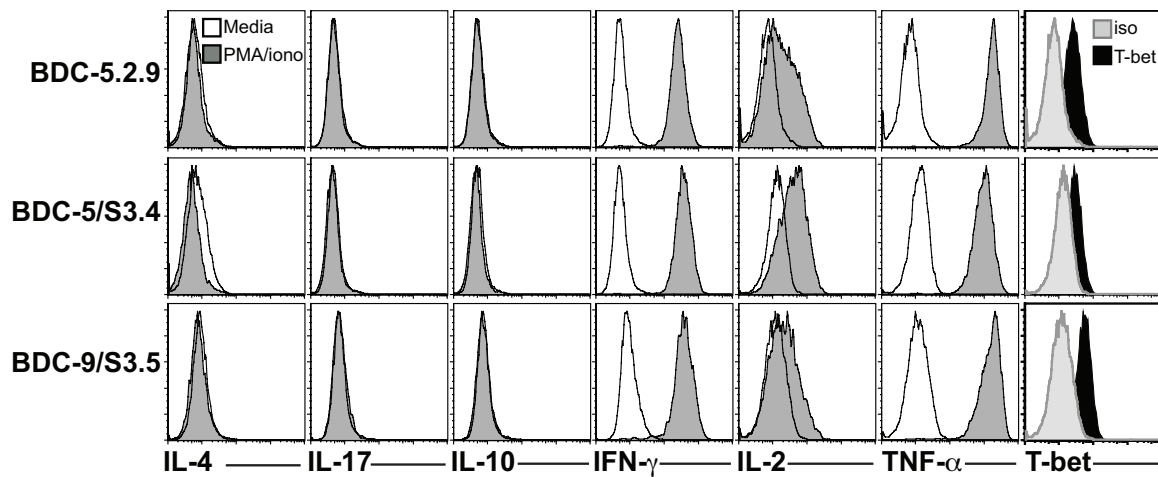

**Supplemental Figure 2. Cytokine profile and T-bet expression on three IAPP-reactive T cell clones.** The BDC-5.2.9, BDC-5/S3.4 or BDC-9/S3.5 T cell clones were expanded and then cultured in the presence of Brefeldin A, with or without PMA/ionomycin. After 3 h, cells were harvested, stained for intracellular cytokines or T-bet, and analyzed by flow cytometry. Histogram overlays represent cytokine levels of clones stimulated with PMA/ionomycin (gray filled histogram) or unstimulated (white filled histograms). For T-bet staining, histogram overlays represent T-bet levels of clones stimulated with PMA/ionomycin (black filled histogram) vs. isotype control (light gray filled histograms).
